# Supplementary material for: Role of vitamin D supplementation in modifying outcomes after surgery: a systematic review of randomised controlled trials
Source: HighWire-hosted journal article supplement (doi:10.1136/bmjopen-2023-073431), 2024-01-01
Supplement: bmjopen-2023-073431supp004_data_supplement.pdf [file bmjopen-2023-073431supp004_data_supplement.pdf]

Supplementary Table 3 – Vitamin D interventions

| Author                         | Time Started <sup>b</sup>    | Duration                     | Vitamin D Intervention Arm |                        |                          | Control Arm                |
|--------------------------------|------------------------------|------------------------------|----------------------------|------------------------|--------------------------|----------------------------|
|                                |                              |                              | Type                       | Dose/<br>Frequency     | Equivalent<br>Daily Dose | Type                       |
| Aberg (2015)                   | Post-op (6 weeks)            | 1 year                       | Cholecalciferol (D3)       | 1,600IU OD             | 40mcg                    | Calcium carbonate          |
| Barker (2021)                  | Pre-op (1 day)               | 3 days                       | Cholecalciferol (D3)       | 50,000IU OD            | 1250mcg                  | Placebo tablet             |
| Cerit (2018)                   | Pre-op (48 hours)            | Single dose                  | Vitamin D                  | 50,000IU <i>once</i>   | 1250mcg<br><i>once</i>   | No treatment               |
| De Bruyn (2020)                | Post-op (<2 weeks)           | NR                           | Cholecalciferol (D3)       | 25,000IU <i>weekly</i> | 625mcg<br><i>weekly</i>  | Placebo vials              |
| Eslami (2021)                  | Pre-op (3 days)              | 3 days                       | Vitamin D                  | 50,000IU TDS           | 3750mcg                  | Inactive medication tablet |
| Genser (2013)                  | Pre-op (1 day)               | 9 days                       | Alfacalcidol               | 2mcg OD                | 2mcg                     | No treatment               |
| Haji-Ketab (2021) <sup>a</sup> | Pre-op (5 days)              | Single dose                  | Vitamin D                  | 300,000IU <i>once</i>  | 7500mcg<br><i>once</i>   | Placebo IM injection       |
| Hao (2021)                     | Post-op                      | 3 days                       | Calcitriol                 | 0.25mcg BD             | 0.5mcg                   | Calcium carbonate          |
| Krasowska (2019)               | Pre-op (5 weeks)             | 5 weeks                      | Vitamin D                  | 3,200IU OD             | 80mcg                    | Vegetable oil              |
| Naguib (2021)                  | Pre-op (2 days)              | LOS <sup>c</sup> in hospital | Alfacalcidol               | 2mcg OD                | 2mcg                     | No treatment               |
| Parekh (2018)                  | Pre-op (3-14 days)           | Single dose                  | Cholecalciferol (D3)       | 300,000IU <i>once</i>  | 7500mcg<br><i>once</i>   | Placebo                    |
| Rowe (2018)                    | Pre-op (7 days)              | 6 days                       | Cholecalciferol (D3)       | 50,000IU OD            | 1250mcg                  | Rice flower capsule        |
| Slobogean (2020)               | Post-op (<2 weeks)           | 6 months                     | Vitamin D drops            | 2,000IU BD             | 100mcg                   | Placebo                    |
| Urashima (2019)                | Post-op (1 <sup>st</sup> FU) | Length of trial              | Vitamin D                  | 2,000IU OD             | 50mcg                    | Placebo                    |

<sup>a</sup> Hajimohammadebrahim-Ketabforoush <sup>b</sup> Where treatment commenced preoperatively, the time in brackets represents the number of days/weeks prior to surgery (where reported); for postoperative treatment, this represents the number of days/weeks after surgery. FU=First outpatient follow-up. <sup>c</sup> LOS – Length of Stay
